# Supplementary material
Source: PubMed Central journal article supplement (PMC6744306)
Supplement: NIHMS1030974-supplement-Supp_FigS1-9.pdf [file NIHMS1030974-supplement-Supp_FigS1-9.pdf]

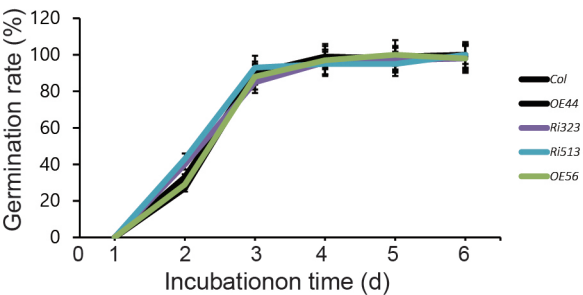

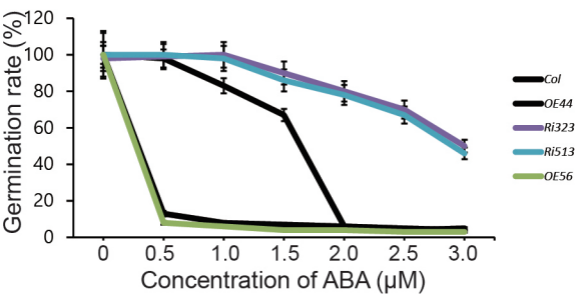

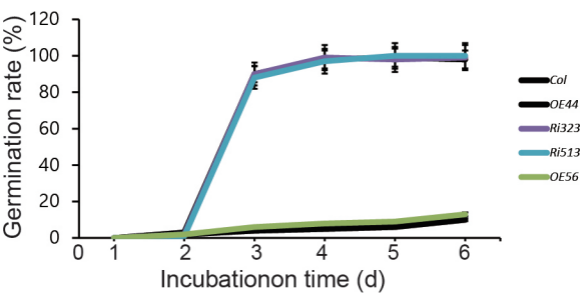

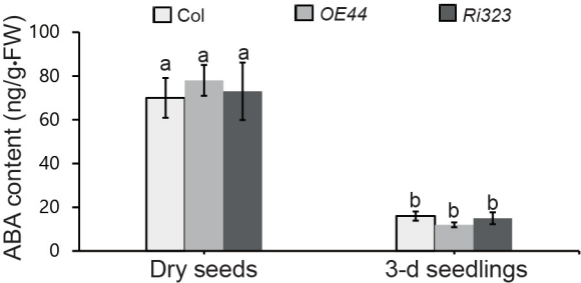

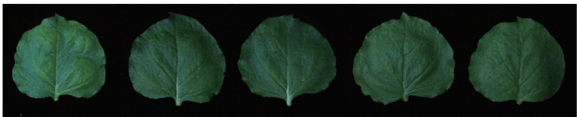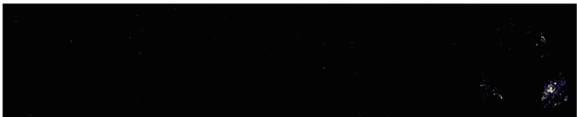

*35S:BBX19:LUC-C*

*35S:BBX21:LUC-C*

*35S:ABI5:LUC-N*

*35S:BBX19:LUC-C*  
*+35S:ABI5:LUC-N*

*35S:BBX21:LUC-C*  
*+35S:ABI5:LUC-N*

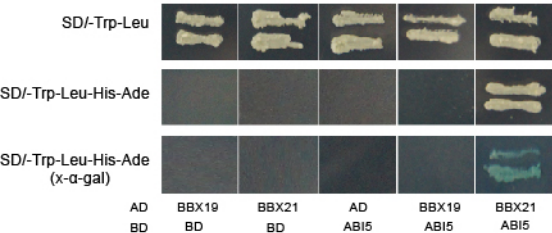

**a**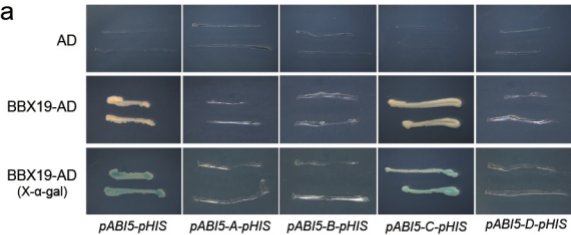**b**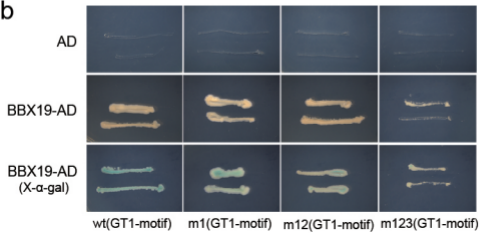

**Hot Probe(GT1-motif1)**GACACACAGATTTTCATTTTCA**GGTTAA**CACTTTTCTTGTTTTAT**Mutant Probe**GACACACAGATTTTCATTTTCA**GTTTTA**CACTTTTCTTGTTTTAT

|              |   |   |     |     |     |   |     |     |     |
|--------------|---|---|-----|-----|-----|---|-----|-----|-----|
| BBX19-HIS    | - | + | +   | +   | +   | + | +   | +   | +   |
| Hot Probe    | + | + | +   | +   | +   | - | +   | +   | +   |
| Mutant Probe | - | - | -   | -   | -   | + | 10x | 20x | 30x |
| Cold Probe   | - | - | 10x | 20x | 30x | - | -   | -   | -   |
|              | 1 | 2 | 3   | 4   | 5   | 6 | 7   | 8   | 9   |

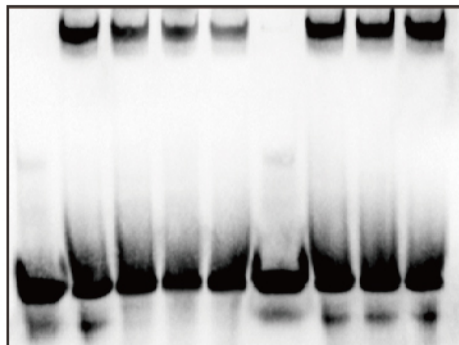**Hot Probe(GT1-motif2)**TTATTTTACTAATCATCA**GGTTAA**GCTCTAGATTATCTTT**Mutant Probe**TTATTTTACTAATCATCA**GTTTTA**GCTCTAGATTATCTTT

|              |   |   |     |     |     |   |     |     |     |
|--------------|---|---|-----|-----|-----|---|-----|-----|-----|
| BBX19-HIS    | - | + | +   | +   | +   | + | +   | +   | +   |
| Hot Probe    | + | + | +   | +   | +   | - | +   | +   | +   |
| Mutant Probe | - | - | -   | -   | -   | + | 10x | 20x | 30x |
| Cold Probe   | - | - | 10x | 20x | 30x | - | -   | -   | -   |
|              | 1 | 2 | 3   | 4   | 5   | 6 | 7   | 8   | 9   |

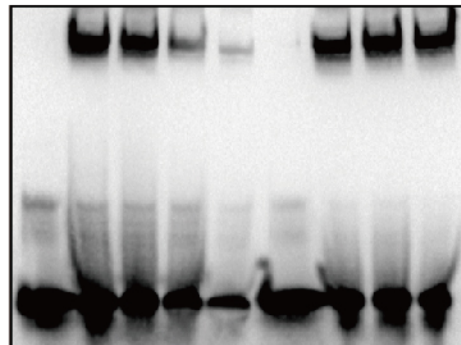**Hot Probe(GT1-motif3)**AAGAAGAAAACGAGTC**GGTTAA**GATATTTTCCTCTTTTG**Mutant Probe**AAGAAGAAAACGAGTC**GTTTTA**GATATTTTCCTCTTTTG

|              |   |   |     |     |     |   |     |     |     |
|--------------|---|---|-----|-----|-----|---|-----|-----|-----|
| BBX19-HIS    | - | + | +   | +   | +   | + | +   | +   | +   |
| Hot Probe    | + | + | +   | +   | +   | - | +   | +   | +   |
| Mutant Probe | - | - | -   | -   | -   | + | 10x | 20x | 30x |
| Cold Probe   | - | - | 10x | 20x | 30x | - | -   | -   | -   |
|              | 1 | 2 | 3   | 4   | 5   | 6 | 7   | 8   | 9   |

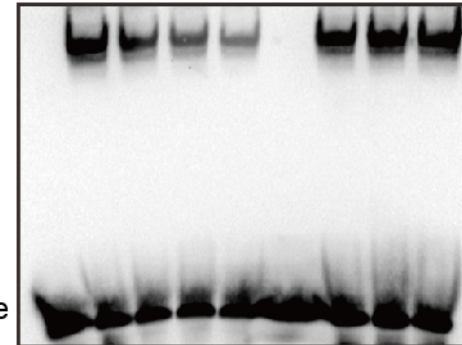

Free Probe

Free Probe

Free Probe



*pABI5-pHIS*

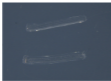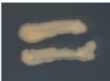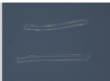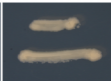

*pABI5-pHIS*  
(X- $\alpha$ -gal)

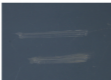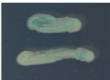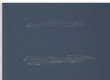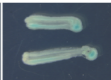

AD

*BBX19-AD*

*BBX19-N-AD*

*BBX19-C-AD*
